# Supplementary material for: The consequences of exercise-induced weight loss on food reinforcement. A randomized controlled trial
Source: PubMed Central journal article supplement (PMC7302707; doi:10.1371/journal.pone.0234692), 2020-06-18
Supplement: pone.0234692.s003.pdf [file pone.0234692.s003.pdf]

# Health History Questionnaire

NAME: \_\_\_\_\_ DATE: \_\_\_\_\_

Birthdate: \_\_\_\_\_ Gender: Male Female

Height: \_\_\_\_\_ Weight: \_\_\_\_\_ BMI \_\_\_\_\_

Person to contact in case of Emergency:

Name: \_\_\_\_\_ Phone: \_\_\_\_\_

1. Are you taking any medications or drugs?

If YES, please list medication, dose and reason:

Medication: \_\_\_\_\_ Dose: \_\_\_\_\_ Reason: \_\_\_\_\_

*Use the back for more space*

YES NO

- 1. Has your doctor ever said that you have a heart condition and that you should only do physical activity recommended by a doctor?
- 2. Do you feel pain in your chest when you do physical activity?
- 3. In the past month, have you had chest pain when you weren't doing physical activity?
- 4. Do you lose your balance because of dizziness or do you ever lose consciousness?
- 5. Do you have a bone or joint problem that could be made worse by a change in your physical activity?
- 6. Is your doctor currently prescribing drugs (for example, water pills) for your blood pressure or heart condition?
- 7. Do you know of any other reason why you should not do physical activity?

| <b>General Health Questions:</b>                             | <b>Yes</b>               | <b>No</b>                |
|--------------------------------------------------------------|--------------------------|--------------------------|
| <b>History of heart problems, chest pain or stroke</b>       | <input type="checkbox"/> | <input type="checkbox"/> |
| <b>Increased blood pressure</b>                              | <input type="checkbox"/> | <input type="checkbox"/> |
| <b>History of breathing or lung problems</b>                 | <input type="checkbox"/> | <input type="checkbox"/> |
| <b>Diabetes or thyroid disease</b>                           | <input type="checkbox"/> | <input type="checkbox"/> |
| <b>Seizures, tremors or severe headaches</b>                 | <input type="checkbox"/> | <input type="checkbox"/> |
| <b>Arthritis or other bone problems</b>                      | <input type="checkbox"/> | <input type="checkbox"/> |
| <b>Increased blood cholesterol</b>                           | <input type="checkbox"/> | <input type="checkbox"/> |
| <b>Use products containing tobacco or nicotine regularly</b> | <input type="checkbox"/> | <input type="checkbox"/> |
| <b>Recent surgery (last 12 months)</b>                       | <input type="checkbox"/> | <input type="checkbox"/> |
| <b>Any other chronic illness or condition Please List:</b>   | <input type="checkbox"/> | <input type="checkbox"/> |
