# Supplementary material for: The consequences of exercise-induced weight loss on food reinforcement. A randomized controlled trial
Source: PubMed Central journal article supplement (PMC7302707; doi:10.1371/journal.pone.0234692), 2020-06-18

# Simple Histogram for Delta PmaxTotal

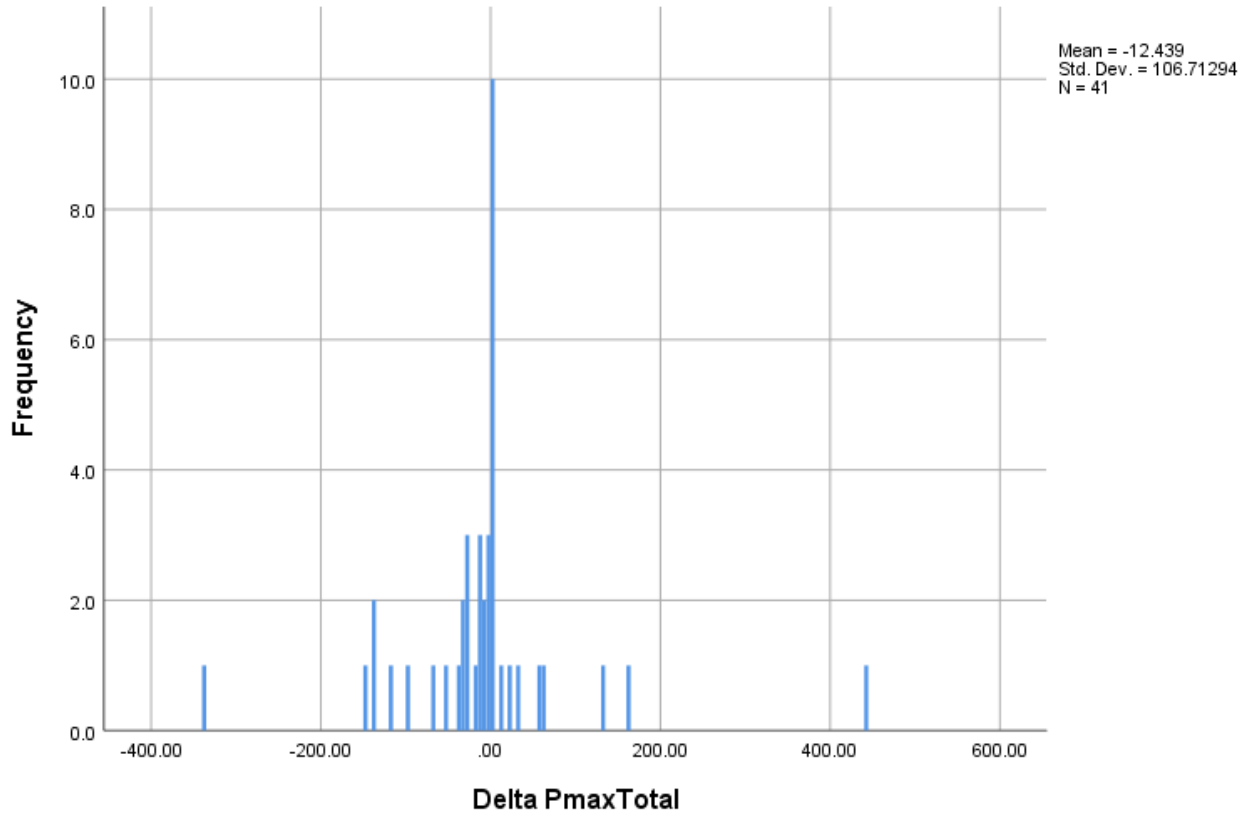

Supplement: pone.0234692.s007.pdf [file pone.0234692.s007.pdf]
