# Supplementary material for: The consequences of exercise-induced weight loss on food reinforcement. A randomized controlled trial
Source: PLOS journal article supplement (doi:10.1371/journal.pone.0234692), 2020-06-18
Supplement: S5 (10.1371/journal.pone.0234692.s005) [file journal.pone.0234692.s005]

## LIKING OF STUDY FOODS

Date \_\_\_\_\_

Participant # \_\_\_\_\_

Please circle the number that best represents how much you like each food listed.

### Oreo Cookies

1    2    3    4    5    6    7    8    9    10    11

*Do not like it at all*

*Like it very much*

### Mixed Nuts

1    2    3    4    5    6    7    8    9    10    11

*Do not like it at all*

*Like it very much*

### Doritos

1    2    3    4    5    6    7    8    9    10    11

*Do not like it at all*

*Like it very much*

### Nutri-grain bar

1    2    3    4    5    6    7    8    9    10    11

*Do not like it at all*

*Like it very much*

### Dried Banana

1    2    3    4    5    6    7    8    9    10    11

*Do not like it at all*

*Like it very much*

### Snickers Bar

1    2    3    4    5    6    7    8    9    10    11

*Do not like it at all*

*Like it very much*
